# Supplementary material for: Host Factors Affect the Gut Microbiome More Significantly than Diet Shift
Source: MDPI journal article supplement (doi:10.3390/microorganisms9122520), 2021-12-06
Supplement: s1 [file s1]

SUPPLEMENTAL INFORMATION TITLES AND LEGENDS

Supplemental Figures

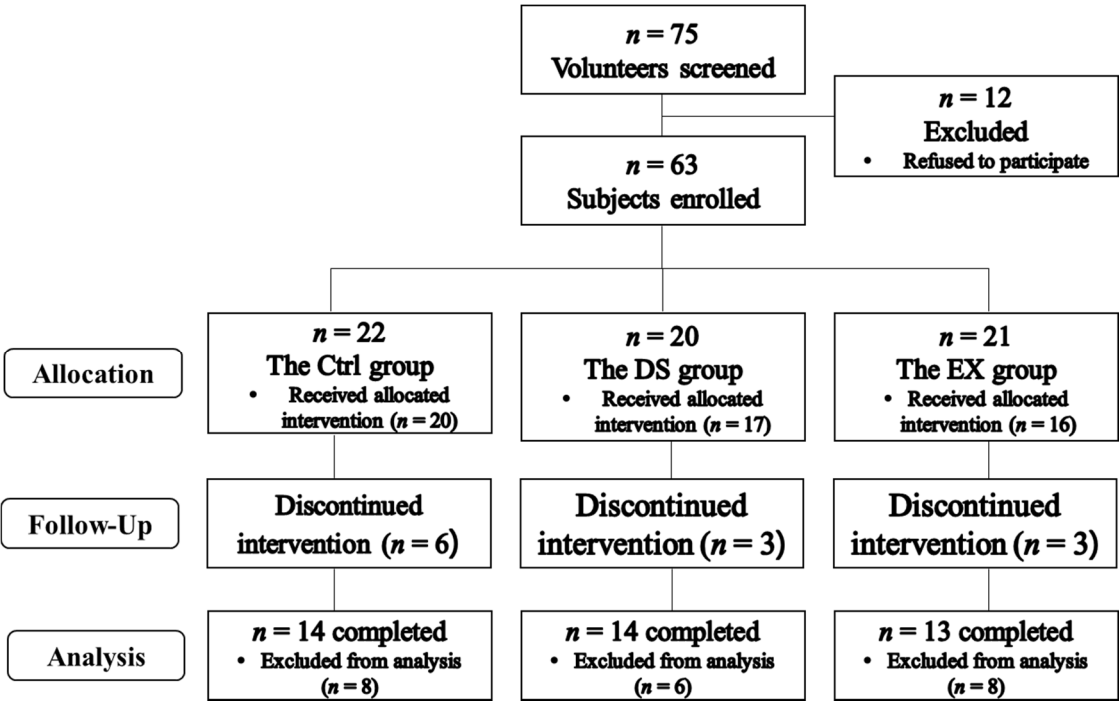

Figure S1. Flow chart for the study subjects. The Ctrl, DS, and EX represents the control, diet shift, and exercise groups each.

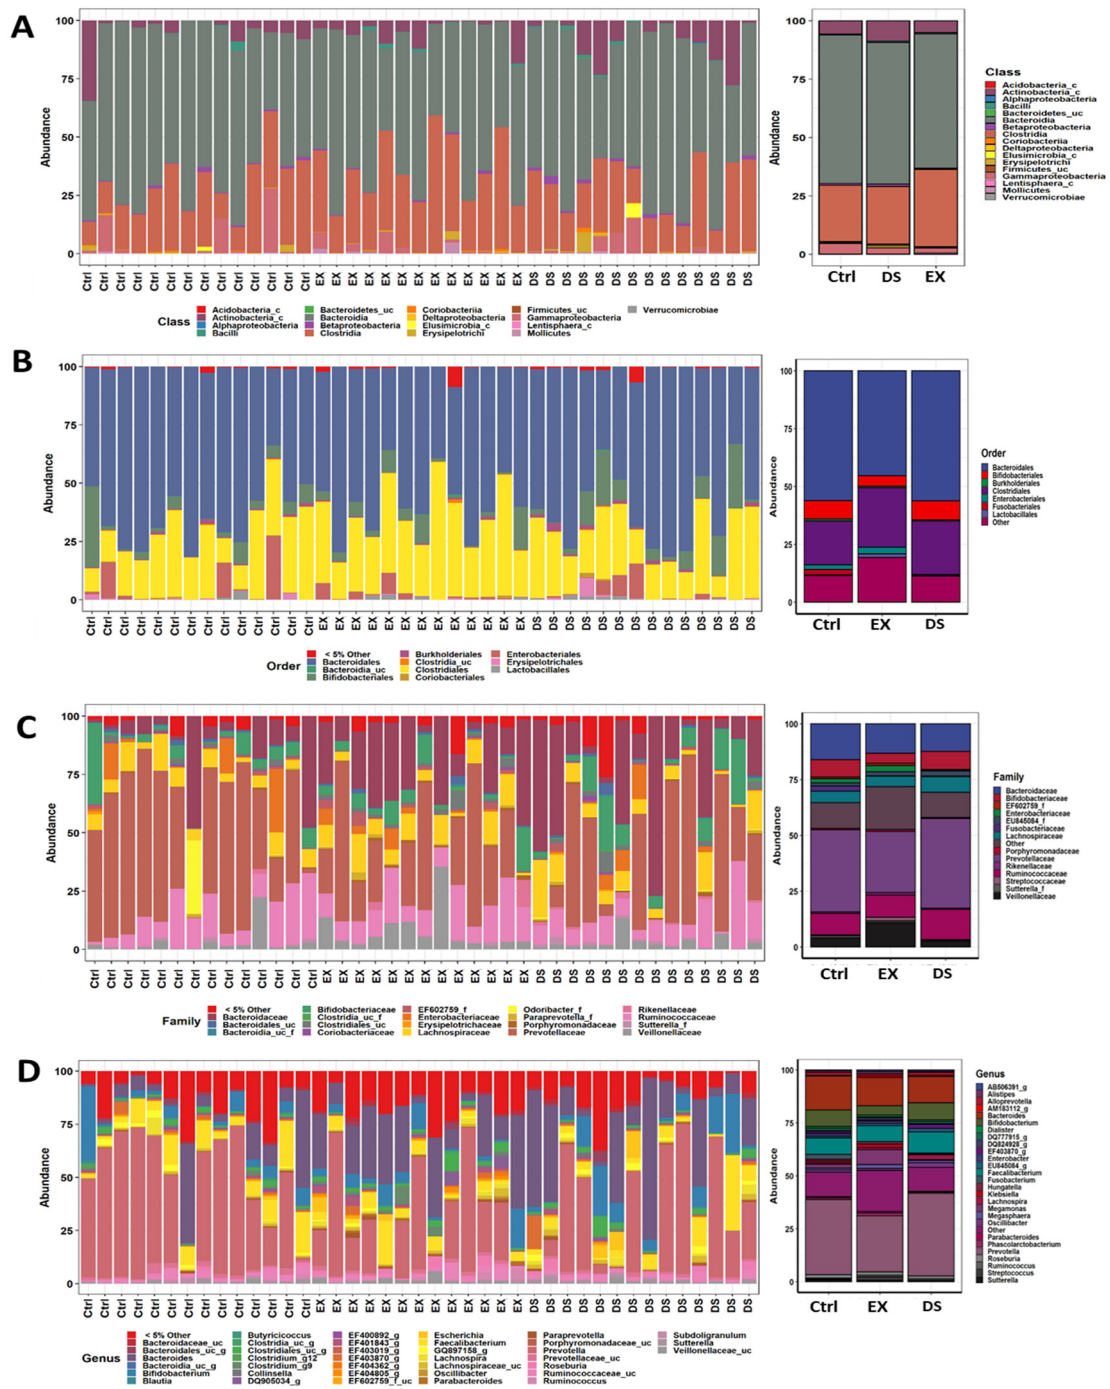

Figure S2. The composition changes of gut microbiome after diet shift or exercise. The composition changes of gut microbiome at (A) class levels (B) order levels (C) family levels and (D) genus during the 12 week experimental period are shown. The Ctrl, EX, and DS represents the control, exercise, and diet shift groups each.

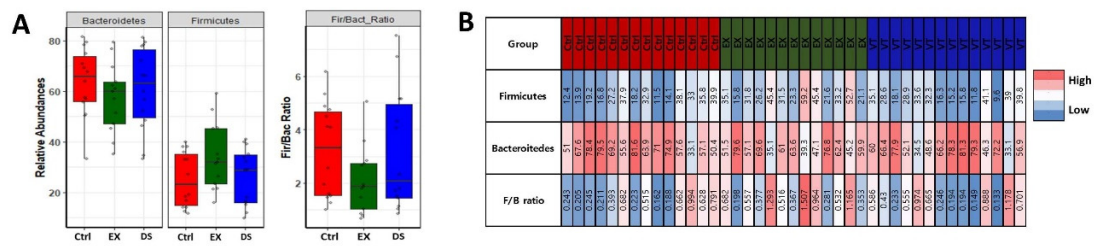

**Figure S3. The abundance change of Bacteroidetes and Firmicutes in the gut microbiome in the three experimental groups.** The Ctrl, EX and DS represents the control, exercise, and diet shift groups each. .

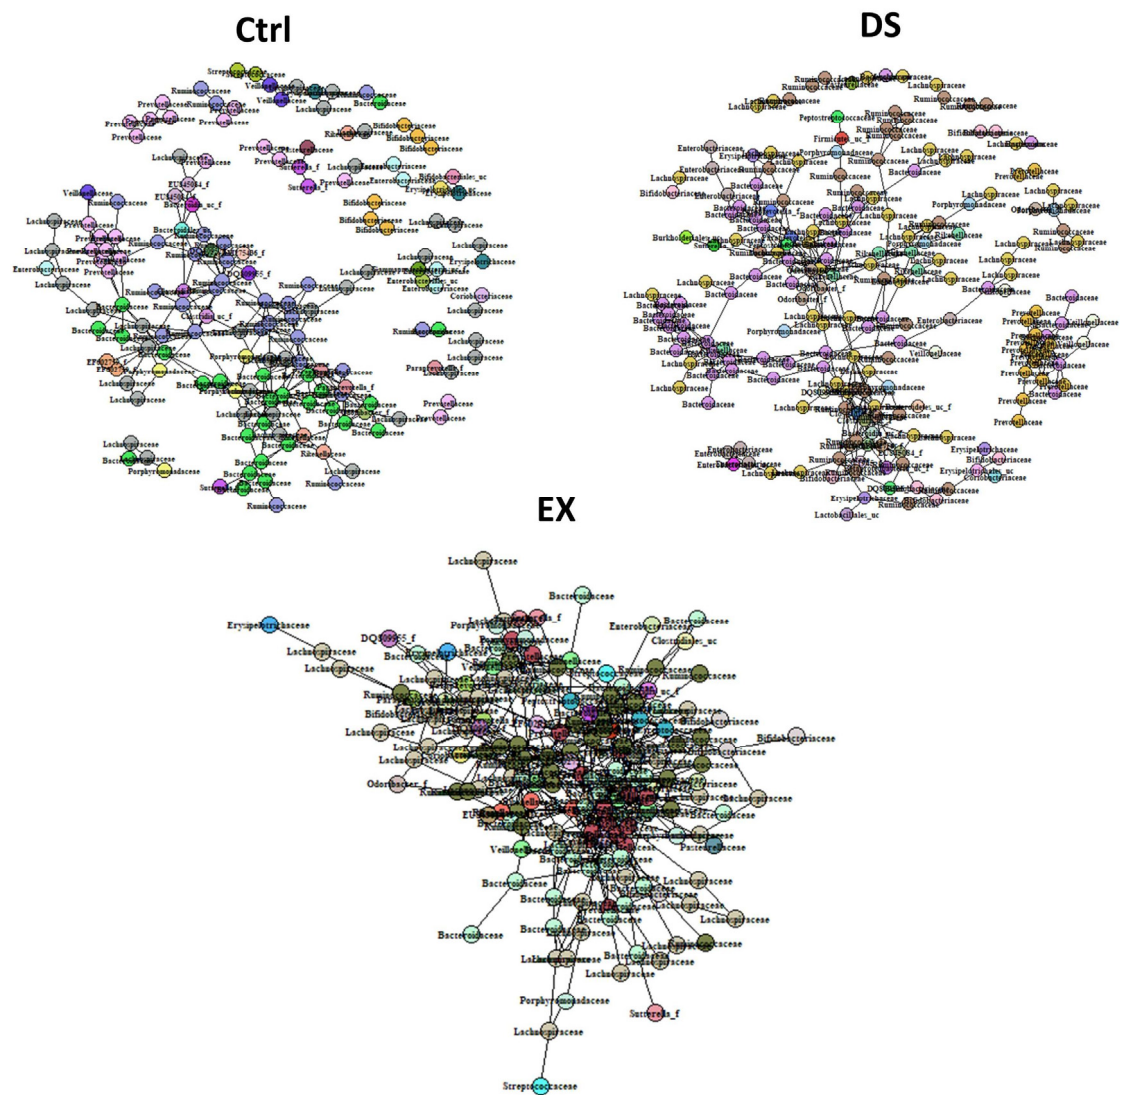

**Figure S4. Co-occurrence network analysis by the ReBoot algorithm for the Ctrl, EX, and DS groups.** Color-coded network graph representations of the co-occurrence interactions among OTUs in family level.

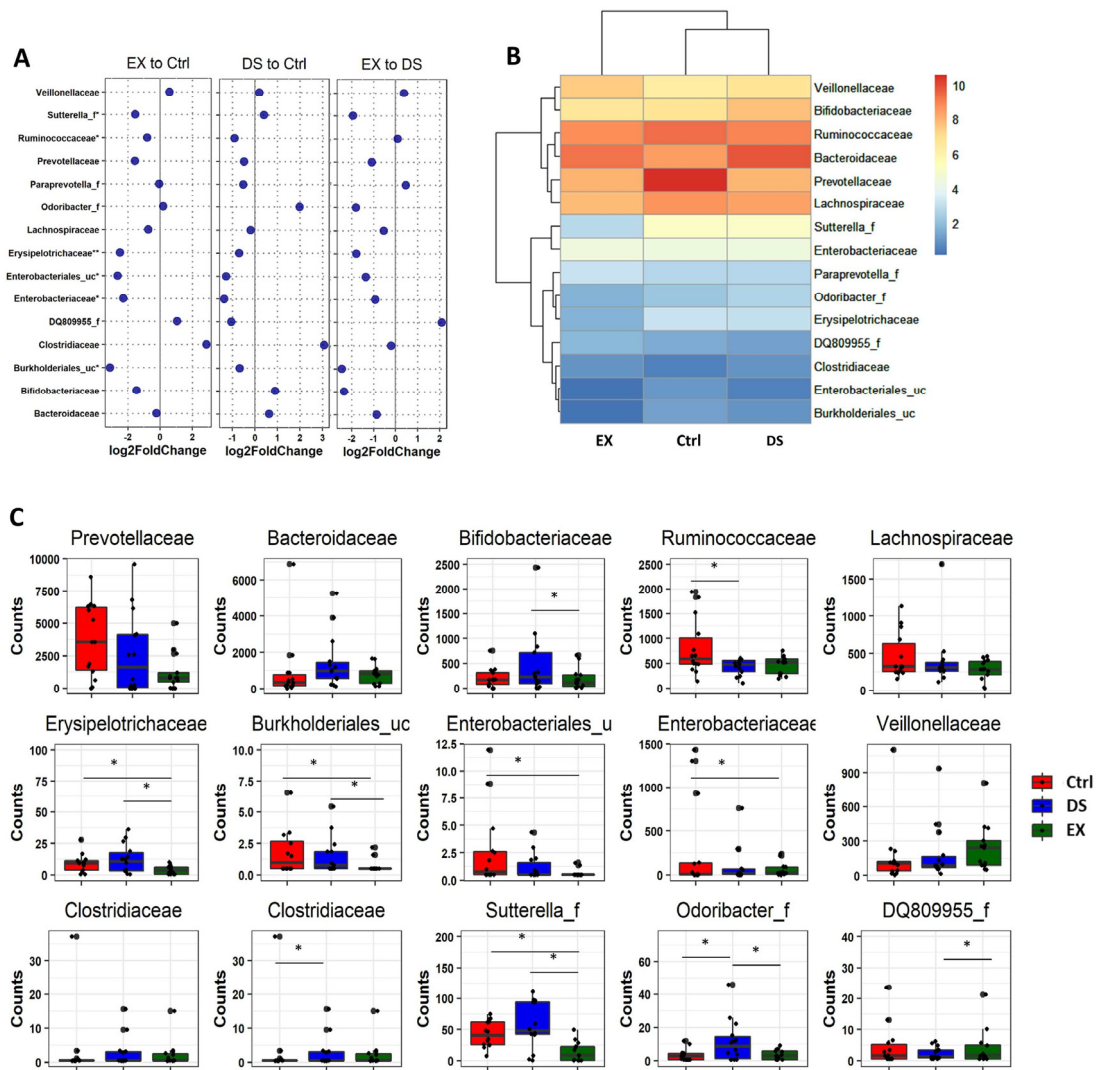

**Figure S5. The most significantly changed microbes at family level by differential abundance analysis.** (A) Log2 fold change of abundance on most abundantly present families in the gut microbiome of the three experimental groups analyzed by DESeq2 differential abundance analysis. Each point represents a species comparison between two experimental groups. (B) Heatmap of most abundantly present species in the three experimental groups. (C) Normalized abundances of significantly different 15 families of interest that were identified from differential abundance analyses. Boxplot represent normalized count abundances of individual species in each group.  $p$  value  $< 0.05$  was considered as significant. The Ctrl, EX, and DS represents the control, exercise, and diet shift groups each.

**Table S1. The valid reads of 16S rRNA amplicon sequence.**

| Group              | Ctrl      | EX       | DS        |
|--------------------|-----------|----------|-----------|
| <b>Total reads</b> | 7664±2045 | 3275±165 | 8928±1198 |

All values are the mean±SEM. OTUs, operational taxonomic units; Ctrl, the control group; Ex, the physical exercise group; DS, the vegetarian diet group.

**Table S2. The  $\alpha$ -diversity indexes for each sample.  $p$  value calculated by Kruskal-Wallis test, and Wilcoxon sum test was used for group comparison. The Ctrl, EX, and DS represents the control, exercise, and diet shift groups each.**

| Group                    | ACE    | se.ACE | Shannon | Simpson | InvSimpson | Fisher | Evenness    |
|--------------------------|--------|--------|---------|---------|------------|--------|-------------|
| Ctrl                     | 254.94 | 8.30   | 2.86    | 0.85    | 6.47       | 35.84  | 0.52        |
| Ctrl                     | 288.78 | 8.82   | 3.15    | 0.88    | 8.39       | 40.23  | 0.56        |
| Ctrl                     | 399.07 | 10.02  | 3.28    | 0.90    | 9.74       | 51.29  | 0.55        |
| Ctrl                     | 290.28 | 9.13   | 2.79    | 0.88    | 8.25       | 30.74  | 0.49        |
| Ctrl                     | 252.85 | 8.32   | 3.37    | 0.93    | 13.35      | 33.90  | 0.61        |
| Ctrl                     | 245.04 | 8.17   | 3.81    | 0.96    | 22.34      | 41.74  | 0.69        |
| Ctrl                     | 277.56 | 8.90   | 2.90    | 0.86    | 7.18       | 30.34  | 0.52        |
| Ctrl                     | 269.96 | 8.44   | 3.92    | 0.96    | 26.14      | 46.38  | 0.70        |
| Ctrl                     | 299.64 | 9.68   | 3.61    | 0.94    | 15.92      | 46.12  | 0.63        |
| Ctrl                     | 274.45 | 8.98   | 3.54    | 0.93    | 15.35      | 41.76  | 0.63        |
| Ctrl                     | 215.64 | 7.78   | 3.62    | 0.94    | 15.60      | 35.85  | 0.67        |
| Ctrl                     | 343.96 | 10.05  | 4.18    | 0.97    | 28.66      | 64.01  | 0.72        |
| Ctrl                     | 242.89 | 8.82   | 3.40    | 0.94    | 15.76      | 36.67  | 0.62        |
| Ctrl                     | 200.30 | 7.47   | 3.51    | 0.94    | 16.64      | 30.61  | 0.66        |
| EX                       | 260.31 | 8.31   | 3.96    | 0.96    | 24.44      | 44.25  | 0.71        |
| EX                       | 230.76 | 7.99   | 2.72    | 0.79    | 4.76       | 33.03  | 0.50        |
| EX                       | 297.10 | 8.81   | 4.41    | 0.98    | 49.36      | 58.50  | 0.78        |
| EX                       | 256.62 | 7.97   | 4.02    | 0.96    | 25.09      | 50.27  | 0.72        |
| EX                       | 234.80 | 7.82   | 3.91    | 0.96    | 26.89      | 42.36  | 0.72        |
| EX                       | 142.47 | 6.37   | 3.69    | 0.96    | 23.16      | 33.02  | 0.74        |
| EX                       | 244.33 | 8.84   | 3.67    | 0.95    | 19.10      | 37.02  | 0.67        |
| EX                       | 160.22 | 6.29   | 3.18    | 0.91    | 10.58      | 26.01  | 0.63        |
| EX                       | 309.78 | 9.48   | 4.18    | 0.97    | 30.11      | 57.79  | 0.73        |
| EX                       | 310.26 | 9.54   | 3.59    | 0.93    | 13.72      | 44.36  | 0.63        |
| EX                       | 282.15 | 9.84   | 3.87    | 0.95    | 21.34      | 43.65  | 0.69        |
| EX                       | 314.10 | 9.22   | 4.32    | 0.97    | 37.29      | 63.44  | 0.75        |
| EX                       | 240.73 | 9.00   | 3.15    | 0.91    | 10.59      | 31.20  | 0.57        |
| DS                       | 353.45 | 9.95   | 3.61    | 0.94    | 16.56      | 47.48  | 0.62        |
| DS                       | 350.40 | 9.45   | 4.07    | 0.97    | 29.45      | 53.76  | 0.69        |
| DS                       | 399.62 | 10.38  | 3.37    | 0.89    | 8.96       | 52.12  | 0.56        |
| DS                       | 349.99 | 10.12  | 3.80    | 0.95    | 19.08      | 52.27  | 0.65        |
| DS                       | 341.50 | 9.78   | 3.90    | 0.95    | 21.72      | 55.46  | 0.67        |
| DS                       | 311.02 | 9.07   | 3.75    | 0.95    | 19.72      | 40.71  | 0.65        |
| DS                       | 405.98 | 10.70  | 3.66    | 0.95    | 19.66      | 54.19  | 0.61        |
| DS                       | 157.14 | 6.57   | 3.08    | 0.90    | 9.89       | 25.21  | 0.61        |
| DS                       | 350.53 | 9.47   | 3.14    | 0.87    | 7.73       | 46.25  | 0.54        |
| DS                       | 223.13 | 7.43   | 3.21    | 0.90    | 10.45      | 31.11  | 0.59        |
| DS                       | 311.94 | 8.91   | 3.97    | 0.96    | 26.27      | 53.19  | 0.69        |
| DS                       | 192.07 | 7.62   | 2.77    | 0.84    | 6.20       | 24.17  | 0.53        |
| DS                       | 153.86 | 7.20   | 2.47    | 0.86    | 7.31       | 15.31  | 0.49        |
| DS                       | 406.30 | 10.47  | 3.93    | 0.95    | 19.89      | 60.14  | 0.65        |
| Kruskal-Wallis $p$ value | 0.09   | 0.28   | 0.15    | 0.10    | 0.10       | 0.47   | <b>0.02</b> |
| $p$ value CvsE           | 0.27   | 0.35   | 0.08    | 0.28    | 0.05       | 0.46   | <b>0.03</b> |
| $p$ value CvsD           | 0.25   | 0.47   | 0.74    | 0.90    | 0.73       | 0.47   | 0.98        |
| $p$ value DvsE           | 0.06   | 0.18   | 0.17    | 0.34    | 0.09       | 0.97   | <b>0.02</b> |

**Table S3. Comparison of taxonomy abundance at Phylum level.** The Ctrl, EX, and DS represents the control, exercise, and diet shift groups each.

|   | <b>Phylum</b>   | <b>Ctrl (%)</b> | <b>DS (%)</b> | <b>EX (%)</b> |
|---|-----------------|-----------------|---------------|---------------|
| 1 | Bacteroidetes   | 63.57           | 60.65         | 57.55         |
| 2 | Firmicutes      | 25.02           | 26.02         | 34.02         |
| 3 | Proteobacteria  | 5.21            | 3.77          | 2.48          |
| 4 | Actinobacteria  | 5.91            | 8.92          | 5.3           |
| 5 | Elusimicrobia   | 0.11            | 0.44          | 0             |
| 6 | Tenericutes     | 0.11            | 0.18          | 0.6           |
| 7 | Lentisphaerae   | 0.07            | 0.03          | 0.01          |
| 8 | Verrucomicrobia | 0               | 0             | 0.04          |
| 9 | Acidobacteria   | 0               | 0             | 0.01          |



**Table S4. Co-occurrence network indices.** The Ctrl, EX, and DS represents the control, exercise, and diet shift groups each.

| Network Indexes indices     | Ctrl   | DS     | EX     |
|-----------------------------|--------|--------|--------|
| Node                        | 161    | 205    | 171    |
| Edge                        | 274    | 397    | 535    |
| Network Density             | 0.021  | 0.019  | 0.037  |
| Assortativity               | -0.010 | -0.008 | -0.009 |
| Module                      | 28     | 20     | 8      |
| Network Heterogeneity       | 0.613  | 0.718  | 0.676  |
| Network Centralization      | 0.11   | 0.071  | 0.084  |
| Clustering coefficient      | 0.424  | 0.336  | 0.347  |
| Average Number of Neighbors | 4.465  | 4.09   | 4.693  |

**Table S5. The comparison of the abundance of the phyla constituting the gut microbiome of the three experimental groups by DESeq2 differential abundance analysis. The Ctrl, EX, and DS represents the control, exercise, and diet shift groups each.**

**DS to Ctrl**

|   | <b>Phylum</b>   | <b>baseMean</b> | <b>log2FoldChange</b> | <b>lfcSE</b> | <b>stat</b> | <b>pvalue</b> | <b>padj</b> |
|---|-----------------|-----------------|-----------------------|--------------|-------------|---------------|-------------|
| 6 | Tenericutes     | 13.522          | -0.544                | 1.414        | -0.385      | 0.700         | 0.909       |
| 8 | Verrucomicrobia | 0.637           | -0.453                | 3.572        | -0.127      | 0.899         | 0.909       |
| 4 | Actinobacteria  | 316.759         | -0.385                | 0.616        | -0.624      | 0.532         | 0.909       |
| 3 | Firmicutes      | 1471.933        | 0.187                 | 0.267        | 0.700       | 0.484         | 0.909       |
| 2 | Bacteroidetes   | 3454.093        | 0.347                 | 0.295        | 1.173       | 0.241         | 0.909       |
| 9 | Elusimicrobia   | 0.017           | 0.408                 | 3.573        | 0.114       | 0.909         | 0.909       |
| 7 | Acidobacteria   | 0.112           | 0.869                 | 3.573        | 0.243       | 0.808         | 0.909       |
| 5 | Lentisphaerae   | 1.018           | 0.966                 | 2.410        | 0.401       | 0.689         | 0.909       |
| 1 | Proteobacteria  | 152.004         | 1.304                 | 0.546        | 2.387       | 0.017         | 0.153       |

**EX to Ctrl**

|   | <b>Phylum</b>   | <b>baseMean</b> | <b>log2FoldChange</b> | <b>lfcSE</b> | <b>stat</b> | <b>pvalue</b> | <b>padj</b> |
|---|-----------------|-----------------|-----------------------|--------------|-------------|---------------|-------------|
| 5 | Verrucomicrobia | 0.637           | -3.529                | 3.620        | -0.975      | 0.330         | 0.593       |
| 3 | Tenericutes     | 13.522          | -2.393                | 1.441        | -1.661      | 0.097         | 0.290       |
| 8 | Acidobacteria   | 0.112           | -1.357                | 3.641        | -0.373      | 0.709         | 0.776       |
| 9 | Elusimicrobia   | 0.017           | -1.034                | 3.642        | -0.284      | 0.776         | 0.776       |
| 2 | Firmicutes      | 1471.933        | -0.468                | 0.273        | -1.716      | 0.086         | 0.290       |
| 7 | Actinobacteria  | 316.759         | 0.270                 | 0.629        | 0.429       | 0.668         | 0.776       |
| 4 | Bacteroidetes   | 3454.093        | 0.369                 | 0.301        | 1.225       | 0.220         | 0.496       |
| 1 | Proteobacteria  | 152.004         | 1.467                 | 0.559        | 2.624       | 0.009         | 0.078       |
| 6 | Lentisphaerae   | 1.018           | 1.894                 | 2.496        | 0.758       | 0.448         | 0.672       |

**EX to DS**

|   | <b>Phylum</b>   | <b>baseMean</b> | <b>log2FoldChange</b> | <b>lfcSE</b> | <b>stat</b> | <b>pvalue</b> | <b>padj</b> |
|---|-----------------|-----------------|-----------------------|--------------|-------------|---------------|-------------|
| 7 | Lentisphaerae   | 1.018           | -0.927                | 2.501        | -0.371      | 0.711         | 0.866       |
| 3 | Actinobacteria  | 316.759         | -0.655                | 0.629        | -1.041      | 0.298         | 0.866       |
| 8 | Proteobacteria  | 152.004         | -0.164                | 0.559        | -0.292      | 0.770         | 0.866       |
| 9 | Bacteroidetes   | 3454.093        | -0.023                | 0.301        | -0.075      | 0.940         | 0.940       |
| 1 | Firmicutes      | 1471.933        | 0.655                 | 0.273        | 2.402       | 0.016         | 0.147       |
| 6 | Elusimicrobia   | 0.017           | 1.443                 | 3.643        | 0.396       | 0.692         | 0.866       |
| 2 | Tenericutes     | 13.522          | 1.849                 | 1.435        | 1.288       | 0.198         | 0.866       |
| 5 | Acidobacteria   | 0.112           | 2.226                 | 3.642        | 0.611       | 0.541         | 0.866       |
| 4 | Verrucomicrobia | 0.637           | 3.076                 | 3.619        | 0.850       | 0.395         | 0.866       |

**Table S6. The comparison of the abundance of the families constituting the gut microbiome of the three experimental groups by DESeq2 differential abundance analysis.** The Ctrl, EX, and DS represents the control, exercise, and diet shift groups each.

|    | Family                | baseMean | EX to DS        |       |       |        | DS to Ctrl      |       |       |        | EX to Ctrl      |       |       |        |
|----|-----------------------|----------|-----------------|-------|-------|--------|-----------------|-------|-------|--------|-----------------|-------|-------|--------|
|    |                       |          | log2Fold Change | lfcSE | stat  | pvalue | log2Fold Change | lfcSE | stat  | pvalue | log2Fold Change | lfcSE | stat  | pvalue |
| 1  | Prevotellaceae        | 2556.55  | -1.09           | 1.01  | -1.07 | 0.28   | -0.48           | 0.99  | -0.48 | 0.63   | -1.57           | 1.01  | -1.54 | 0.12   |
| 2  | Bacteroidaceae        | 1053.93  | -0.86           | 0.59  | -1.45 | 0.15   | 0.63            | 0.58  | 1.09  | 0.28   | -0.23           | 0.59  | -0.38 | 0.70   |
| 3  | Bifidobacteriaceae    | 576.11   | -2.34           | 0.86  | -2.71 | 0.01   | 0.90            | 0.85  | 1.06  | 0.29   | -1.45           | 0.86  | -1.68 | 0.09   |
| 4  | Ruminococcaceae       | 570.65   | 0.09            | 0.31  | 0.30  | 0.76   | -0.90           | 0.30  | -2.97 | 0.00   | -0.80           | 0.31  | -2.61 | 0.01   |
| 5  | Lachnospiraceae       | 383.23   | -0.54           | 0.38  | -1.43 | 0.15   | -0.19           | 0.37  | -0.50 | 0.61   | -0.73           | 0.38  | -1.92 | 0.05   |
| 6  | Veillonellaceae       | 199.86   | 0.38            | 0.58  | 0.66  | 0.51   | 0.20            | 0.56  | 0.36  | 0.72   | 0.58            | 0.58  | 1.01  | 0.31   |
| 7  | Enterobacteriaceae    | 153.38   | -0.93           | 1.07  | -0.86 | 0.39   | -1.36           | 1.05  | -1.29 | 0.20   | -2.29           | 1.07  | -2.13 | 0.03   |
| 8  | Clostridiales_uc      | 73.09    | -0.36           | 0.38  | -0.95 | 0.34   | 0.36            | 0.38  | 0.96  | 0.34   | 0.00            | 0.39  | 0.00  | 1.00   |
| 9  | EU845084_f            | 59.22    | -1.38           | 1.71  | -0.81 | 0.42   | 0.71            | 1.68  | 0.42  | 0.67   | -0.67           | 1.71  | -0.39 | 0.69   |
| 10 | Bacteroidales_uc      | 39.95    | -0.66           | 0.52  | -1.27 | 0.20   | 0.08            | 0.51  | 0.16  | 0.87   | -0.58           | 0.52  | -1.11 | 0.27   |
| 11 | Sutterella_f          | 37.93    | -1.94           | 0.57  | -3.41 | 0.00   | 0.40            | 0.55  | 0.73  | 0.46   | -1.54           | 0.57  | -2.70 | 0.01   |
| 12 | EF602759_f            | 34.15    | 0.95            | 1.10  | 0.87  | 0.38   | -0.78           | 1.08  | -0.72 | 0.47   | 0.18            | 1.09  | 0.16  | 0.87   |
| 13 | Rikenellaceae         | 30.83    | 0.49            | 0.98  | 0.50  | 0.62   | 1.18            | 0.96  | 1.22  | 0.22   | 1.67            | 0.98  | 1.70  | 0.09   |
| 14 | Porphyromonadaceae    | 28.48    | -0.02           | 0.43  | -0.05 | 0.96   | 0.58            | 0.42  | 1.37  | 0.17   | 0.56            | 0.43  | 1.29  | 0.20   |
| 15 | Paraprevotella_f      | 20.07    | 0.47            | 1.00  | 0.47  | 0.64   | -0.52           | 0.98  | -0.53 | 0.60   | -0.05           | 1.00  | -0.05 | 0.96   |
| 16 | Coriobacteriaceae     | 12.75    | -1.18           | 0.81  | -1.45 | 0.15   | 0.13            | 0.78  | 0.16  | 0.87   | -1.05           | 0.81  | -1.29 | 0.20   |
| 17 | Erysipelotrichaceae   | 11.98    | -1.79           | 0.75  | -2.38 | 0.02   | -0.70           | 0.70  | -1.00 | 0.32   | -2.49           | 0.75  | -3.32 | 0.00   |
| 18 | Streptococcaceae      | 9.63     | 1.09            | 1.16  | 0.93  | 0.35   | -0.04           | 1.15  | -0.03 | 0.97   | 1.05            | 1.16  | 0.90  | 0.37   |
| 19 | Clostridia_uc_f       | 9.02     | -0.30           | 0.43  | -0.70 | 0.49   | 0.03            | 0.42  | 0.08  | 0.94   | -0.27           | 0.44  | -0.61 | 0.54   |
| 20 | Odoribacter_f         | 5.76     | -1.80           | 0.72  | -2.49 | 0.01   | 1.99            | 0.71  | 2.82  | 0.00   | 0.19            | 0.75  | 0.26  | 0.80   |
| 21 | Pasteurellaceae       | 5.60     | -0.61           | 1.29  | -0.47 | 0.64   | -0.56           | 1.25  | -0.44 | 0.66   | -1.16           | 1.29  | -0.90 | 0.37   |
| 22 | Bacteroidia_uc_f      | 5.43     | -0.52           | 0.67  | -0.77 | 0.44   | -0.02           | 0.64  | -0.03 | 0.98   | -0.54           | 0.68  | -0.79 | 0.43   |
| 23 | Erysipelotrichales_uc | 4.93     | 0.17            | 1.56  | 0.11  | 0.91   | -2.81           | 1.50  | -1.87 | 0.06   | -2.64           | 1.53  | -1.72 | 0.09   |
| 24 | DQ809955_f            | 4.54     | 2.11            | 0.91  | 2.31  | 0.02   | -1.04           | 0.91  | -1.15 | 0.25   | 1.06            | 0.90  | 1.19  | 0.24   |
| 25 | AM275436_f            | 4.21     | 0.26            | 1.43  | 0.18  | 0.85   | 1.15            | 1.42  | 0.81  | 0.42   | 1.41            | 1.45  | 0.97  | 0.33   |
| 26 | DQ809526_f            | 2.09     | 0.41            | 1.06  | 0.39  | 0.70   | 1.22            | 1.09  | 1.11  | 0.27   | 1.63            | 1.11  | 1.47  | 0.14   |
| 27 | Peptostreptococcaceae | 1.93     | 0.55            | 1.05  | 0.52  | 0.60   | 1.01            | 1.08  | 0.94  | 0.35   | 1.56            | 1.10  | 1.43  | 0.15   |
| 28 | Lactobacillaceae      | 1.89     | 1.08            | 1.47  | 0.73  | 0.46   | -2.30           | 1.41  | -1.63 | 0.10   | -1.23           | 1.43  | -0.86 | 0.39   |
| 29 | Burkholderiales_uc    | 1.67     | -2.44           | 1.16  | -2.11 | 0.04   | -0.67           | 1.03  | -0.65 | 0.51   | -3.12           | 1.15  | -2.70 | 0.01   |
| 30 | AF371945_f            | 1.66     | 0.64            | 1.83  | 0.35  | 0.72   | 1.76            | 1.84  | 0.95  | 0.34   | 2.40            | 1.87  | 1.28  | 0.20   |
| 31 | Clostridiaceae        | 1.47     | -0.20           | 1.44  | -0.14 | 0.89   | 3.08            | 1.47  | 2.09  | 0.04   | 2.88            | 1.51  | 1.91  | 0.06   |
| 32 | Mogibacterium_f       | 1.29     | -0.11           | 1.25  | -0.09 | 0.93   | 0.51            | 1.23  | 0.42  | 0.68   | 0.41            | 1.27  | 0.32  | 0.75   |
| 33 | EF445272_f            | 1.08     | 1.20            | 2.30  | 0.52  | 0.60   | -0.23           | 2.27  | -0.10 | 0.92   | 0.97            | 2.31  | 0.42  | 0.67   |
| 34 | Enterobacteriales_uc  | 1.02     | -1.36           | 1.28  | -1.06 | 0.29   | -1.27           | 1.17  | -1.09 | 0.28   | -2.63           | 1.26  | -2.09 | 0.04   |
| 35 | AB185535_f            | 1.00     | -1.52           | 3.14  | -0.49 | 0.63   | -1.72           | 3.04  | -0.57 | 0.57   | -3.25           | 3.12  | -1.04 | 0.30   |

**Table S7. The List of microbial families constituting the gut microbiome of the three experimental groups.** The Ctrl, EX, and DS represents the control, exercise, and diet shift groups each.

|    | Family                | Ctrl (%) | DS (%) | EX (%) |
|----|-----------------------|----------|--------|--------|
| 1  | Prevotellaceae        | 46.61    | 30.02  | 28.02  |
| 2  | Bacteroidaceae        | 11.48    | 25.42  | 23.3   |
| 3  | Ruminococcaceae       | 12.99    | 11.17  | 13.58  |
| 4  | Lachnospiraceae       | 6.68     | 8.09   | 8.31   |
| 5  | Bifidobacteriaceae    | 5.63     | 8.59   | 5.08   |
| 6  | Veillonellaceae       | 2.86     | 2.92   | 7.85   |
| 7  | Enterobacteriaceae    | 4.31     | 2.41   | 1.92   |
| 8  | Clostridiales_uc      | 1.15     | 1.83   | 2.13   |
| 9  | EU845084_f            | 1.01     | 1.84   | 0.98   |
| 10 | Odoribacter_f         | 2.3      | 0.23   | 0.08   |
| 11 | Bacteroidales_uc      | 0.71     | 0.83   | 0.87   |
| 12 | EF602759_f            | 0.54     | 0.48   | 1.35   |
| 13 | Rikenellaceae         | 0.23     | 0.71   | 1.22   |
| 14 | Sutterella_f          | 0.69     | 1.06   | 0.39   |
| 15 | Porphyromonadaceae    | 0.33     | 0.61   | 0.91   |
| 16 | Paraprevotella_f      | 0.25     | 0.38   | 0.68   |
| 17 | Streptococcaceae      | 0.33     | 0.2    | 0.39   |
| 18 | Erysipelotrichales_uc | 0.27     | 0.56   | 0.06   |
| 19 | Coriobacteriaceae     | 0.24     | 0.28   | 0.2    |
| 20 | Clostridia_uc_f       | 0.16     | 0.19   | 0.25   |
| 21 | Erysipelotrichaceae   | 0.22     | 0.24   | 0.1    |
| 22 | Elusimicrobiaceae     | 0.11     | 0.44   | 0      |
| 23 | DQ809955_f            | 0.1      | 0.05   | 0.26   |
| 24 | AF371945_f            | 0.01     | 0.11   | 0.28   |
| 25 | Lactobacillaceae      | 0.04     | 0.22   | 0.11   |
| 26 | AM275436_f            | 0.04     | 0.1    | 0.2    |
| 27 | Bacteroidia_uc_f      | 0.09     | 0.12   | 0.13   |
| 28 | Pasteurellaceae       | 0.11     | 0.09   | 0.11   |
| 29 | Erysipelotrichi_uc_f  | 0.03     | 0.05   | 0.22   |
| 30 | EF445272_f            | 0.02     | 0.01   | 0.19   |
| 31 | Peptostreptococcaceae | 0.02     | 0.06   | 0.09   |
| 32 | DQ809526_f            | 0.02     | 0.04   | 0.1    |
| 33 | Clostridiaceae        | 0.04     | 0.06   | 0.06   |
| 34 | GU112192_f            | 0.01     | 0.02   | 0.11   |
| 35 | AM275436_o_uc         | 0.02     | 0.01   | 0.07   |
| 36 | EU844239_f            | 0.01     | 0      | 0.09   |
| 37 | Mogibacterium_f       | 0.01     | 0.03   | 0.04   |
| 38 | Enterococcaceae       | 0        | 0.07   | 0      |
| 39 | Burkholderiales_uc    | 0.04     | 0.03   | 0      |
| 40 | AB185535_f            | 0.06     | 0.01   | 0      |

**Table S8. The comparison of the bacterial species differentially abundant in the the gut microbiome in Ctrl and EX groups by DESeq2 differential abundance analysis.  $p$  value < 0.05 is represent in the table.**

|    | Species                              | baseMean | log2FoldChange | lfcSE | stat   | pvalue |
|----|--------------------------------------|----------|----------------|-------|--------|--------|
| 2  | <i>Bacteroides fragilis</i>          | 7.712    | -5.918         | 1.757 | -3.368 | 0.001  |
| 3  | <i>Phascolarctobacterium faecium</i> | 6.37     | -5.788         | 2.021 | -2.865 | 0.004  |
| 4  | <i>Megasphaera elsdenii</i>          | 28.748   | -5.538         | 2.052 | -2.699 | 0.007  |
| 5  | <i>Megasphaera_uc</i>                | 5.9      | -4.627         | 2.152 | -2.15  | 0.032  |
| 6  | <i>Streptococcus parasanguinis</i>   | 1.646    | -4.411         | 2.185 | -2.019 | 0.043  |
| 7  | DQ793660_s                           | 2.672    | -4.134         | 1.687 | -2.45  | 0.014  |
| 8  | <i>Veillonella dispar</i>            | 4.824    | -4.127         | 1.467 | -2.813 | 0.005  |
| 9  | <i>Bacteroides caccae</i>            | 7.104    | -3.796         | 1.006 | -3.773 | 0      |
| 10 | <i>Eubacterium siraeum</i>           | 1.692    | -3.515         | 1.288 | -2.729 | 0.006  |
| 11 | DQ805681_s                           | 11.683   | -3.475         | 0.906 | -3.836 | 0      |
| 12 | 4P000072_s                           | 4.128    | -3.473         | 1.301 | -2.669 | 0.008  |
| 13 | DQ456272_s                           | 2.733    | -3.235         | 1.389 | -2.33  | 0.02   |
| 14 | EU777390_g_uc                        | 3.142    | -3.206         | 1.197 | -2.677 | 0.007  |
| 15 | <i>Parabacteroides distasonis</i>    | 2.533    | -3.118         | 1.209 | -2.58  | 0.01   |
| 16 | DQ905718_s                           | 0.607    | -2.993         | 1.336 | -2.24  | 0.025  |
| 17 | EF404287_s                           | 8.326    | -2.932         | 1.027 | -2.854 | 0.004  |
| 1  | <i>Bacteroides vulgatus</i>          | 129.563  | -2.799         | 0.699 | -4.003 | 0      |
| 18 | EF401882_g_uc                        | 2.829    | -2.603         | 1.277 | -2.038 | 0.042  |
| 19 | DQ804825_s                           | 3.54     | -2.538         | 1.055 | -2.406 | 0.016  |
| 20 | DQ905034_g_uc                        | 5.813    | -2.481         | 0.881 | -2.814 | 0.005  |
| 21 | <i>Odoribacter_uc</i>                | 0.802    | -2.405         | 1.214 | -1.981 | 0.048  |
| 22 | EF404077_s                           | 7.992    | -2.328         | 0.965 | -2.413 | 0.016  |
| 23 | 4P000883_s                           | 1.147    | -2.104         | 1.07  | -1.966 | 0.049  |
| 24 | <i>Bacteroides uniformis</i>         | 19.496   | -1.763         | 0.812 | -2.172 | 0.03   |
| 25 | <i>Veillonellaceae_uc_s</i>          | 34.798   | -1.428         | 0.591 | -2.415 | 0.016  |
| 26 | <i>Clostridiales_uc_s</i>            | 61.756   | -0.857         | 0.345 | -2.481 | 0.013  |
| 27 | EF402172_s                           | 59.013   | 1.102          | 0.471 | 2.338  | 0.019  |
| 28 | <i>Subdoligranulum_uc</i>            | 6.311    | 1.378          | 0.695 | 1.981  | 0.048  |
| 29 | <i>Sutterella_f_uc_s</i>             | 2.33     | 1.866          | 0.853 | 2.187  | 0.029  |
| 30 | <i>Bifidobacterium_uc</i>            | 23.13    | 2.084          | 0.996 | 2.093  | 0.036  |
| 31 | <i>Sutterella_uc</i>                 | 5.672    | 2.348          | 0.88  | 2.668  | 0.008  |
| 32 | GQ897158_s                           | 48.592   | 2.437          | 0.901 | 2.703  | 0.007  |
| 33 | <i>Blautia_uc</i>                    | 3.879    | 2.585          | 0.833 | 3.103  | 0.002  |
| 34 | <i>Burkholderiales_uc_s</i>          | 1.598    | 2.73           | 1.216 | 2.245  | 0.025  |
| 35 | EU462041_s                           | 59.173   | 2.788          | 1.294 | 2.155  | 0.031  |
| 36 | EU461711_s                           | 57.319   | 3.412          | 1.521 | 2.243  | 0.025  |
| 37 | DQ795906_s                           | 17.478   | 4.572          | 1.879 | 2.433  | 0.015  |
| 38 | <i>Dialister succinatiphilus</i>     | 8.913    | 4.73           | 2.267 | 2.087  | 0.037  |
| 39 | 4P000023_s                           | 16.634   | 5.145          | 2.473 | 2.081  | 0.037  |

**Table S9. The comparison of the bacterial species differentially abundant in the the gut microbiome in Ctrl and DS groups by DESeq2 differential abundance analysis. p value < 0.05 is represent in the table.**

|    | Species                              | baseMean | log2FoldChange | lfcSE | stat   | pvalue |
|----|--------------------------------------|----------|----------------|-------|--------|--------|
| 1  | <i>Blautia_uc</i>                    | 3.879    | 2.720          | 0.774 | 3.512  | 0.000  |
| 2  | <i>Bacteroides vulgatus</i>          | 129.563  | -2.361         | 0.686 | -3.443 | 0.001  |
| 3  | <i>DQ795906_s</i>                    | 17.478   | 6.378          | 1.856 | 3.436  | 0.001  |
| 4  | <i>Bacteroides fragilis</i>          | 7.712    | -5.054         | 1.726 | -2.928 | 0.003  |
| 5  | <i>EF402172_s</i>                    | 59.013   | 1.258          | 0.459 | 2.742  | 0.006  |
| 6  | <i>4P000072_s</i>                    | 4.128    | -3.474         | 1.270 | -2.736 | 0.006  |
| 7  | <i>DQ805681_s</i>                    | 11.683   | -2.412         | 0.890 | -2.710 | 0.007  |
| 8  | <i>4P000873_s</i>                    | 4.106    | -2.904         | 1.177 | -2.467 | 0.014  |
| 9  | <i>Megasphaera elsdenii</i>          | 28.748   | -4.963         | 2.014 | -2.464 | 0.014  |
| 10 | <i>EF401818_s</i>                    | 1.481    | 2.887          | 1.200 | 2.405  | 0.016  |
| 11 | <i>4P000883_s</i>                    | 1.147    | -2.332         | 1.011 | -2.307 | 0.021  |
| 12 | <i>Bacteroides_uc</i>                | 188.848  | -0.969         | 0.425 | -2.282 | 0.022  |
| 13 | <i>EF401233_s</i>                    | 2.098    | 2.463          | 1.081 | 2.279  | 0.023  |
| 14 | <i>Odoribacter_uc</i>                | 0.802    | -2.625         | 1.156 | -2.271 | 0.023  |
| 15 | <i>Coprococcus_uc</i>                | 2.296    | 2.470          | 1.097 | 2.252  | 0.024  |
| 16 | <i>Phascolarctobacterium faecium</i> | 6.370    | -4.250         | 1.987 | -2.139 | 0.032  |
| 17 | <i>Odoribacter_f_uc_s</i>            | 1.845    | -1.567         | 0.734 | -2.134 | 0.033  |
| 18 | <i>Bacteroidaceae_uc_s</i>           | 41.825   | -0.661         | 0.333 | -1.988 | 0.047  |

**Table S10. The comparison of the bacterial species differentially abundant in the the gut microbiome in EX and DS groups by DESeq2 differential abundance analysis. p value < 0.05 is represent in the table.**

|    | Species                           | baseMean | log2FoldChange | lfcSE | stat   | pvalue |
|----|-----------------------------------|----------|----------------|-------|--------|--------|
| 1  | <i>Veillonella dispar</i>         | 4.820    | -4.720         | 1.460 | -3.230 | 0.000  |
| 2  | <i>EF401233_s</i>                 | 2.100    | -3.970         | 1.080 | -3.690 | 0.000  |
| 3  | <i>EF404193_s</i>                 | 0.660    | -3.470         | 1.740 | -2.000 | 0.050  |
| 4  | <i>Veillonella_uc</i>             | 0.770    | -3.360         | 1.610 | -2.090 | 0.040  |
| 5  | <i>Bacteroides caccae</i>         | 7.100    | -3.310         | 0.980 | -3.370 | 0.000  |
| 6  | <i>Parabacteroides distasonis</i> | 2.530    | -3.180         | 1.190 | -2.670 | 0.010  |
| 7  | <i>EF404287_s</i>                 | 8.330    | -2.990         | 1.020 | -2.930 | 0.000  |
| 8  | <i>EF404077_s</i>                 | 7.990    | -2.830         | 0.970 | -2.920 | 0.000  |
| 9  | <i>EF401818_s</i>                 | 1.480    | -2.600         | 1.240 | -2.100 | 0.040  |
| 10 | <i>Coprococcus_uc</i>             | 2.300    | -2.420         | 1.130 | -2.150 | 0.030  |
| 11 | <i>EU777390_g_uc</i>              | 3.140    | -2.390         | 1.160 | -2.060 | 0.040  |
| 12 | <i>Roseburia hominis</i>          | 1.550    | -2.320         | 1.080 | -2.150 | 0.030  |
| 13 | <i>Eubacterium hallii</i>         | 1.010    | -2.200         | 0.920 | -2.400 | 0.020  |
| 14 | <i>EF404388_s</i>                 | 121.030  | 1.820          | 0.850 | 2.140  | 0.030  |
| 15 | <i>GQ897158_s</i>                 | 48.590   | 1.910          | 0.900 | 2.120  | 0.030  |
| 16 | <i>Sutterella_f_uc_s</i>          | 2.330    | 2.180          | 0.840 | 2.600  | 0.010  |
| 17 | <i>Bifidobacterium_uc</i>         | 23.130   | 2.190          | 1.000 | 2.200  | 0.030  |
| 18 | <i>Sutterella_uc</i>              | 5.670    | 2.290          | 0.880 | 2.610  | 0.010  |
| 19 | <i>4P000873_s</i>                 | 4.110    | 2.800          | 1.210 | 2.300  | 0.020  |
| 20 | <i>4P000023_s</i>                 | 16.630   | 5.150          | 2.470 | 2.080  | 0.040  |
| 21 | <i>Dialister succinatiphilus</i>  | 8.910    | 5.660          | 2.260 | 2.500  | 0.010  |

**Table S11. The List of microbial species constituting more than 0.5 % in the gut microbiome of the three experimental groups.** The Ctrl, EX, and DS represents the control, exercise, and diet shift groups each. The species has below 0.5% relative abundance after combining all three groups are not included.

|    | Species                                  | Ctrl (%) | DS (%) | EX (%) |
|----|------------------------------------------|----------|--------|--------|
| 1  | <i>Prevotella copri</i>                  | 15.63    | 16.47  | 11.94  |
| 2  | <i>Prevotella_uc</i>                     | 5.96     | 5.93   | 3.6    |
| 3  | <i>EU461603_s</i>                        | 5.94     | 2.88   | 3.55   |
| 4  | <i>Bifidobacterium pseudocatenulatum</i> | 6.44     | 3.81   | 0.33   |
| 5  | <i>Bacteroides_uc</i>                    | 1.8      | 3.96   | 4.42   |
| 6  | <i>Bacteroides vulgatus</i>              | 0.42     | 2.45   | 4.86   |
| 7  | <i>EU462076_s</i>                        | 4.48     | 1.35   | 1.76   |
| 8  | <i>4P000745_s</i>                        | 3.04     | 2.36   | 2.13   |
| 9  | <i>EU475206_s</i>                        | 5.18     | 0.83   | 1.34   |
| 10 | <i>EF404388_s</i>                        | 1.91     | 2.77   | 1.14   |
| 11 | <i>Prevotella stercora</i>               | 1.37     | 2.24   | 1.55   |
| 12 | <i>Bifidobacterium adolescentis</i>      | 0.53     | 1.91   | 2.64   |
| 13 | <i>Ruminococcaceae_uc_s</i>              | 1.27     | 1.36   | 2.23   |
| 14 | <i>Clostridiales_uc_s</i>                | 1.02     | 1.39   | 1.95   |
| 15 | <i>FJ363527_s</i>                        | 1.67     | 1.04   | 1.44   |
| 16 | <i>Bacteroides plebeius</i>              | 0.65     | 2.45   | 0.77   |
| 17 | <i>Faecalibacterium_uc</i>               | 1.07     | 1.28   | 1.24   |
| 18 | <i>Prevotellaceae_uc_s</i>               | 1.43     | 1.04   | 1.03   |
| 19 | <i>Bacteroides coprocola</i>             | 0.29     | 2.21   | 0.86   |
| 20 | <i>BAAX01003885_s</i>                    | 0.61     | 2.19   | 0.39   |
| 21 | <i>EF402172_s</i>                        | 1.32     | 0.62   | 1.01   |
| 22 | <i>Faecalibacterium prausnitzii</i>      | 0.86     | 0.67   | 1.32   |
| 23 | <i>DQ797252_s</i>                        | 1.62     | 0.63   | 0.52   |
| 24 | <i>EU462041_s</i>                        | 1.64     | 0.68   | 0.39   |
| 25 | <i>Klebsiella pneumoniae</i>             | 2.02     | 0.08   | 0.48   |
| 26 | <i>EU461711_s</i>                        | 1.83     | 0.44   | 0.29   |
| 27 | <i>Megamonas rupellensis</i>             | 0.87     | 0.08   | 1.53   |
| 28 | <i>GQ897158_s</i>                        | 1.09     | 0.84   | 0.32   |
| 29 | <i>Bacteroidaceae_uc_s</i>               | 0.46     | 0.81   | 0.98   |
| 30 | <i>Bacteroidales_uc_s</i>                | 0.65     | 0.77   | 0.82   |
| 31 | <i>Lachnospiraceae_uc_s</i>              | 0.47     | 0.71   | 0.94   |
| 32 | <i>Odoribacter_uc</i>                    | 2        | 0.02   | 0.02   |
| 33 | <i>Veillonellaceae_uc_s</i>              | 0.28     | 0.51   | 1.24   |
| 34 | <i>Escherichia coli group</i>            | 0.14     | 1.31   | 0.53   |
| 35 | <i>Megasphaera elsdenii</i>              | 0.2      | 0.55   | 1.2    |
| 36 | <i>DQ801259_s</i>                        | 0.52     | 1.1    | 0.31   |
| 37 | <i>EF403870_s</i>                        | 0.5      | 0.79   | 0.44   |
| 38 | <i>GQ047204_s</i>                        | 0.43     | 0.98   | 0.33   |
| 39 | <i>Bacteroides eggerthii</i>             | 0        | 0.01   | 1.69   |
| 40 | <i>DQ795058_s</i>                        | 0.69     | 0.53   | 0.46   |
| 41 | <i>Dialister succinatiphilus</i>         | 0.13     | 1.12   | 0.36   |
| 42 | <i>Bifidobacterium stercoris</i>         | 0.26     | 1.07   | 0.3    |
| 43 | <i>EU531928_s</i>                        | 0.38     | 0.17   | 0.96   |
